# Supplementary material for: The Effect of the COVID-19 Pandemic on the Assessment of Sexual Life—Repeated Cross-Sectional Surveys among Polish Adults in 2017, 2020 and 2021
Source: MDPI journal article supplement (doi:10.3390/ijerph19074110), 2022-03-30
Supplement: s1 [file s1]

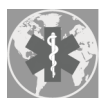

**Table S1.** Mean score per item\* according to sexual life assessment profile\*\* and year of data collection.

| Item                                                                       | 2017 - Sexual life assessment profile |      |           |      |           |      |           |      |           |      |
|----------------------------------------------------------------------------|---------------------------------------|------|-----------|------|-----------|------|-----------|------|-----------|------|
|                                                                            | 1 (N=167)                             |      | 2 (N=292) |      | 3 (N=244) |      | 4 (N=377) |      | 5 (N=962) |      |
|                                                                            | Mean                                  | SD   | Mean      | SD   | Mean      | SD   | Mean      | SD   | Mean      | SD   |
| What is the role of sex in your life at present?                           | 0.63                                  | 0.64 | 2.53      | 0.65 | 0.96      | 0.60 | 1.99      | 0.39 | 3.29      | 0.48 |
| How satisfied are you with your sex life over the past 2-3 months?         | 1.12                                  | 0.79 | 1.86      | 0.71 | 2.10      | 0.58 | 2.89      | 0.51 | 3.44      | 0.52 |
| How do you assess the level of your sexual needs over the past 2-3 months? | 1.25                                  | 1.00 | 2.33      | 0.64 | 0.98      | 0.72 | 1.91      | 0.50 | 2.62      | 0.67 |
| Have your sexual needs over the past 2-3 months been fulfilled?            | 0.68                                  | 0.58 | 1.53      | 0.67 | 2.50      | 0.61 | 3.17      | 0.48 | 3.44      | 0.53 |
| Item                                                                       | 2020 - Sexual life assessment profile |      |           |      |           |      |           |      |           |      |
|                                                                            | 1 (N=196)                             |      | 2 (N=380) |      | 3 (N=263) |      | 4 (N=752) |      | 5 (N=827) |      |
|                                                                            | Mean                                  | SD   | Mean      | SD   | Mean      | SD   | Mean      | SD   | Mean      | SD   |
| What is the role of sex in your life at present?                           | 0.90                                  | 0.71 | 2.77      | 0.79 | 1.23      | 0.68 | 2.52      | 0.57 | 3.46      | 0.52 |
| How satisfied are you with your sex life over the past 2-3 months?         | 0.68                                  | 0.73 | 1.46      | 0.81 | 1.99      | 0.64 | 2.92      | 0.49 | 3.70      | 0.49 |
| How do you assess the level of your sexual needs over the past 2-3 months? | 1.24                                  | 1.06 | 2.61      | 0.79 | 0.93      | 0.72 | 1.99      | 0.43 | 2.87      | 0.75 |
| Have your sexual needs over the past 2-3 months been fulfilled?            | 0.46                                  | 0.57 | 1.33      | 0.80 | 2.40      | 0.70 | 3.11      | 0.50 | 3.61      | 0.54 |
| Item                                                                       | 2021 - Sexual life assessment profile |      |           |      |           |      |           |      |           |      |
|                                                                            | 1 (N=180)                             |      | 2 (N=324) |      | 3 (N=225) |      | 4 (N=611) |      | 5 (N=640) |      |
|                                                                            | Mean                                  | SD   | Mean      | SD   | Mean      | SD   | Mean      | SD   | Mean      | SD   |
| What is the role of sex in your life at present?                           | 0.77                                  | 0.66 | 2.75      | 0.81 | 1.12      | 0.63 | 2.42      | 0.63 | 3.43      | 0.54 |
| How satisfied are you with your sex life over the past 2-3 months?         | 0.78                                  | 0.85 | 1.23      | 0.85 | 2.07      | 0.70 | 2.95      | 0.53 | 3.69      | 0.50 |
| How do you assess the level of your sexual needs over the past 2-3 months? | 1.36                                  | 1.12 | 2.68      | 0.74 | 0.93      | 0.75 | 2.00      | 0.46 | 2.87      | 0.72 |
| Have your sexual needs over the past 2-3 months been fulfilled?            | 0.52                                  | 0.58 | 1.24      | 0.88 | 2.56      | 0.78 | 3.20      | 0.55 | 3.61      | 0.53 |

\*responses ranged 1 to 4 (most positive one); \*\* profiles determined using 2017 data, as described in the paper.

**Table S2.** Ordinal regression models.

| Variable                | Model 1   |      |        | Model 2   |      |        |
|-------------------------|-----------|------|--------|-----------|------|--------|
|                         | Estimates | SE   | p      | Estimates | SE   | p      |
| PROFILE 1 - worst       | -3.94     | 0.18 | <0.001 | -3.80     | 0.17 | <0.001 |
| PROFILE 2               | -2.71     | 0.18 | <0.001 | -2.55     | 0.17 | <0.001 |
| PROFILE 3               | -2.13     | 0.18 | <0.001 | -2.02     | 0.16 | <0.001 |
| PROFILE 4               | -1.09     | 0.17 | <0.001 | -0.80     | 0.16 | <0.001 |
| PROFILE 5 - best (ref.) |           |      |        |           |      |        |
| Age (cont.)             | -0.01     | 0.00 | <0.001 | -0.01     | 0.00 | <0.001 |
| Gender                  |           |      |        |           |      |        |
| Female                  | -0.18     | 0.04 | <0.001 | -0.21     | 0.04 | <0.001 |
| Level of education      |           |      |        |           |      |        |

|                               |       |       |        |       |       |        |
|-------------------------------|-------|-------|--------|-------|-------|--------|
| lower than secondary          | 0.06  | 0.05  | 0.271  | 0.15  | 0.05  | 0.002  |
| secondary                     | 0.04  | 0.06  | 0.463  | 0.10  | 0.06  | 0.082  |
| Place of living               |       |       |        |       |       |        |
| rural areas                   | -0.09 | 0.07  | 0.231  | 0.02  | 0.07  | 0.721  |
| smaller towns                 | -0.03 | 0.07  | 0.669  | 0.05  | 0.07  | 0.488  |
| Employment status             |       |       |        |       |       |        |
| working                       | 0.09  | 0.05  | 0.045  | 0.00  | 0.04  | 0.948  |
| Family material status        |       |       |        |       |       |        |
| low                           | -0.15 | 0.07  | 0.025  | -0.06 | 0.06  | 0.357  |
| average                       | -0.13 | 0.05  | 0.012  | -0.08 | 0.05  | 0.116  |
| Religious beliefs             |       |       |        |       |       |        |
| Believers                     | 0.04  | 0.07  | 0.513  | 0.09  | 0.06  | 0.112  |
| Status of relationship        |       |       |        |       |       |        |
| single                        | -0.61 | 0.06  | <0.001 | -0.59 | 0.06  | <0.001 |
| informal union                | 0.20  | 0.06  | <0.001 | 0.15  | 0.06  | 0.009  |
| Sexual orientation            |       |       |        |       |       |        |
| heterosexual                  | -0.16 | 0.09  | 0.076  | 0.02  | 0.08  | 0.775  |
| Self-rated sexual performance |       |       |        |       |       |        |
| poor                          | -1.63 | 0.09  | <0.001 | -1.95 | 0.08  | <0.001 |
| average                       | -1.27 | 0.07  | <0.001 | -1.40 | 0.07  | <0.001 |
| good                          | -0.79 | 0.06  | <0.001 | -0.89 | 0.06  | <0.001 |
| Last sexual intercourse       |       |       |        |       |       |        |
| this week                     | 0.87  | 0.05  | <0.001 | 0.74  | 0.05  | <0.001 |
| Difficulties hindering sexual |       |       |        |       |       |        |
| activity                      |       |       |        |       |       |        |
| none                          | 0.07  | 0.04  | 0.114  | 0.11  | 0.04  | 0.011  |
| Chronic condition             |       |       |        |       |       |        |
| no                            | 0.12  | 0.05  | 0.014  | 0.10  | 0.04  | 0.033  |
| Survey                        |       |       |        |       |       |        |
| 2020                          | -0.22 | 0.05  | <0.001 | -0.14 | 0.04  | 0.001  |
| Nagelkerke R-sq.              |       | 0.400 |        |       | 0.388 |        |

SE – standard error; Survey: 2017 as reference in Model 1; 2021 in Model 2; Other reference categories: profile 5; male, higher education; large cities; not working (student, unemployed, other); high material status; disbelievers; married; non-heterosexual; very good sexual performance; last intercourse not this week; at least one difficulty hindering sexual activity, chronically ill.
